# Supplementary material for: Triplex Crystal Digital PCR for the Detection and Differentiation of the Wild-Type Strain and the MGF505-2R and I177L Gene-Deleted Strain of African Swine Fever Virus
Source: MDPI journal article supplement (doi:10.3390/pathogens12091092), 2023-08-28
Supplement: s1 [file s1]

## Supplementary

**Table S1.** The sequences of recombinant plasmids pASFV-ΔMGF505-2R and pASFV-ΔI177L.

| Plasmid          | Sequence                                                                                                                                                                                                                                                                                                   |
|------------------|------------------------------------------------------------------------------------------------------------------------------------------------------------------------------------------------------------------------------------------------------------------------------------------------------------|
| pASFV-ΔMGF505-2R | TATCCCTAAGAATATATCTTATAACTAGACTTATAGCAGTAAAAATCAACT<br>TTGGTTATTCTTTTTAATATAAAACGTCTAATTACTTGCAAAGGACTATAA<br>AGCCCATTTTCCTCAGCTAGAATTTTATTTTTTAATGAAGTAGGGGGAT<br>AATTCAATAGATATCCATCATTAAATATTGATTATATTTTGAATATTATCTTC<br>TATGGTGCAAGATAATCATCTAGCGCGTGAAACATGTCCTCTTCTCTCA<br>GGAACCTTGTGCGAAAAAGCTGCCT |
| pASFV-ΔI177L     | GGGATTCTCTATCAGGTGTCTGTACTCTGCTATTAAAAACCTGGAAACC<br>ATGGTTATTTAATATTAATTAAATCCCTGGTTTATTCCTCCTTAAAAGTA<br>GATGAACCTCTTTTGTTTTTATTGGGTTCATTTTACTAAATTATGAAT<br>AAAAGATTATTATATTCGAATGTTTGTCCAATATGGACAACCTTGTCAAC<br>AGATGTTACATTTGATTTGGTTGTTAGTGGCTGAAGCTTGGCACAATCA<br>AAAATAAGCCCATTAACACTAAGATATAG    |
